# Supplementary material for: The chemical composition of free-range and conventionally-farmed eggs available to Canadians in rural Nova Scotia
Source: PeerJ. 2021 May 4;9:e11357. doi: 10.7717/peerj.11357 (PMC8103914; doi:10.7717/peerj.11357)
Supplement: Supplemental Information 1 [file peerj-09-11357-s001.xls]

## Sheet: Sheet0
Canadian Nutrient File (CNF)
Egg, chicken, whole, fresh or frozen, raw
Food code : 125
Nutrient name	Unit	Value per 100 g of edible portion	Number of obser&shy;vations	Standard error	Data source	1 extra large egg / 58 g
Proximates
Moisture	g	76.25	15	0.10	7	44.33
Ash	g	0.96	15	0.00	7	0.56
Protein	g	11.80	15	0.10	7	6.86
Total Fat	g	10.01	15	0.10	7	5.82
Carbohydrate	g	0.98			2	0.57
Alcohol	g	0.00	0	0.00	5	0.00
Energy (kcal)	kCal	145			2	84
Energy (kJ)	kJ	606	0		2	352
Other Carbohydrates
Fibre, total dietary	g	0.0	0	0.0	12	0.0
Glucose	g	0.21			5	0.12
Fructose	g	0.11			5	0.06
Maltose	g	0.11			5	0.06
Galactose	g	0.11			5	0.06
Lactose	g	0.11			5	0.06
Sucrose	g	0.11			5	0.06
Sugars, total	g	0.77	2		5	0.45
Minerals
Calcium, Ca	mg	45	15	0	7	26
Iron, Fe	mg	1.39	15	0.00	7	0.81
Magnesium, Mg	mg	9	15	0	7	5
Phosphorus, P	mg	126	15	3	7	73
Potassium, K	mg	114	15	2	7	66
Sodium, Na	mg	125	15	2	7	73
Zinc, Zn	mg	1.16	15	0.00	7	0.67
Copper, Cu	mg	0.055	15	0.000	7	0.032
Manganese, Mn	mg	0.049	15	0.000	7	0.028
Selenium, Se	µg	34.2	15	2.1	7	19.9
Vitamins
Beta carotene	µg	0	0	0	5	0
Alpha carotene	µg	0	6		5	0
Retinol	µg	191	15	2	7	111
Retinol activity equivalents, RAE	µg	192			2	111
Folacin, total	µg	72	15	1	7	42
Folic acid, synthetic form	µg	0	0		5	0
Folate, naturally occurring	µg	72	15	1	7	42
Dietary folate equivalents, DFE	µg	72	0		2	42
Niacin	mg	0.117	15	0.000	7	0.068
Niacin equivalents	NE	2.732			4	1.588
Pantothenic acid	mg	2.440	15	0.100	7	1.418
Riboflavin	mg	0.495	15	0.000	7	0.288
Thiamin	mg	0.071	15	0.000	7	0.041
Vitamin B-6	mg	0.072	15	0.010	7	0.042
Vitamin B-12	µg	1.90	15	0.10	7	1.10
Vitamin B-12, added	µg	0.00			12	0.00
Choline, total	mg	301.7	15	0.5	7	175.4
Betaine	mg	0.3	6	0.0	5	0.2
Vitamin C	mg	0.0	0	0.0	5	0.0
Vitamin D	µg	1.4	15	0.3	2	0.8
Vitamin D2 (ergocalciferol)	µg	0.0			12	0.0
Vitamin D (IU)	IU	58	15	3	7	33
Vitamin K	µg	0.3			5	0.2
Tocopherol, alpha	mg	2.45	15	0.20	7	1.42
Alpha-tocopherol, added	mg	0.00			12	0.00
Amino Acids
Tryptophan	g	0.157	15	0.000	7	0.091
Threonine	g	0.522	15	0.000	7	0.304
Isoleucine	g	0.630	15	0.000	7	0.366
Leucine	g	1.020	15	0.000	7	0.593
Lysine	g	0.857	15	0.000	7	0.498
Methionine	g	0.357	15	0.000	7	0.208
Cystine	g	0.256	15	0.000	7	0.149
Phenylalanine	g	0.639	15	0.000	7	0.371
Tyrosine	g	0.469	15	0.000	7	0.273
Valine	g	0.806	15	0.000	7	0.469
Arginine	g	0.770	15	0.000	7	0.448
Histidine	g	0.290	15	0.000	7	0.169
Alanine	g	0.691	15	0.000	7	0.401
Aspartic acid	g	1.249	15	0.000	7	0.726
Glutamic acid	g	1.572	15	0.000	7	0.914
Glycine	g	0.406	15	0.000	7	0.236
Proline	g	0.481	15	0.000	7	0.280
Serine	g	0.912	15	0.000	7	0.530
Lipids
Fatty acids, saturated, total	g	3.043	15	0.090	7	1.769
4:0	g	0.000	15	0.000	7	0.000
6:0	g	0.000	15	0.000	7	0.000
8:0	g	0.000	15	0.000	7	0.000
10:0	g	0.000	15	0.000	7	0.000
12:0	g	0.001	15	0.000	7	0.000
14:0	g	0.031	15	0.000	7	0.018
15:0	g	0.006	15	0.000	7	0.003
16:0	g	2.218	15	0.000	7	1.289
17:0	g	0.020	15	0.000	7	0.011
18:0	g	0.760	15	0.000	7	0.442
20:0	g	0.002	15	0.000	7	0.001
22:0	g	0.000	15	0.000	7	0.000
24:0	g	0.004	15	0.000	7	0.002
Fatty acids, monounsaturated, total	g	4.182	15		7	2.431
Fatty acids, trans, total, monoenoic	g	0.048	15	0.000	7	0.028
12:1	g	0.000	15	0.000	7	0.000
Fatty acids, trans, total, polyenoic	g	0.020	15	0.000	7	0.012
14:1	g	0.007	15	0.000	7	0.004
15:1	g	0.000	15	0.000	7	0.000
16:1	g	0.322	15	0.000	7	0.187
16:1c	g	0.315	15	0.000	7	0.183
16:1t	g	0.007	15	0.000	7	0.004
17:1	g	0.014	15	0.000	7	0.008
18:1	g	3.810	15	0.000	7	2.215
18:1c	g	3.769	15	0.000	7	2.191
18:1t	g	0.042	15	0.000	7	0.024
20:1	g	0.021	15	0.000	7	0.012
22:1	g	0.000	15	0.000	7	0.000
22:1c	g	0.000	15	0.000	7	0.000
22:1t	g	0.000	15	0.000	7	0.000
24:1	g	0.007	15	0.000	7	0.004
24:1c	g	0.007	15	0.000	7	0.004
Fatty acids, polyunsaturated, total	g	1.446	15		7	0.841
Fatty acids, polyunsaturated, total omega n-3	g	0.144			2	0.084
Fatty acids, polyunsaturated, total omega n-6	g	1.270			2	0.738
18:2	g	1.109	15	0.000	7	0.645
18:2cla	g	0.014	15	0.000	7	0.008
18:2n6cc	g	1.078	15	0.000	7	0.627
18:2t,t	g	0.017	15	0.000	7	0.010
18:3	g	0.073	15	0.000	7	0.042
18:3i	g	0.003	15	0.000	7	0.002
18:3n3cccn-3	g	0.062	15	0.000	7	0.036
18:3n6cccn-6	g	0.008	15	0.000	7	0.004
18:4	g	0.002	15	0.000	7	0.001
20:2cc	g	0.011	15	0.000	7	0.006
20:3	g	0.000	0		12	0.000
20:3n-6	g	0.016	15	0.000	7	0.009
20:4n-6	g	0.156	15	0.000	7	0.091
20:5n-3 (EPA)	g	0.002	15	0.000	7	0.001
22:2	g	0.000	15	0.000	7	0.000
22:4n-6	g	0.012	15	0.000	7	0.007
22:5n-3 (DPA)	g	0.008	15	0.000	7	0.005
22:6n-3 (DHA)	g	0.072	15	0.000	7	0.042
Fatty acids, trans, total	g	0.069	15	0.000	7	0.040
Total plant sterol	mg	0			5	0
Stigmasterol	mg	0			5	0
Beta-sitosterol	mg	0			5	0
Cholesterol	mg	366	15	3	7	213
Other components
Caffeine	mg	0	0		0	0
Theobromine	mg	0	0		12	0
Aspartame	mg	0	0		0	0
Lutein and zeaxanthin	µg	332	15	0	7	193
Beta cryptozanthin	µg	9	6	1	5	5
Canadian Nutrient File, 2015
Date : 2-Apr-2021
