# Supplementary material for: The chemical composition of free-range and conventionally-farmed eggs available to Canadians in rural Nova Scotia
Source: PeerJ. 2021 May 4;9:e11357. doi: 10.7717/peerj.11357 (PMC8103914; doi:10.7717/peerj.11357)
Supplement: Supplemental Information 2 [file peerj-09-11357-s002.xlsx]

## Sheet: AA comp.
			Amino acids	Free-range (g/100 g)	Conven. (g/ 100 g)	CNF (g/ 100g)				Protein concentration
			Asp acid	1.61275	1.54167	1.14
			Glu	1.13235	1.09722	1.47					Egg Samples
			Ser	0.563725	0.546296	0.75					Free-range	Conventional
			Gly	0.426471	0.416667	0.38				Trial-1	10.78	9.06
			His	0.357843	0.351852	0.26				Trial-2	9.46	9.79
			Arg	0.539216	0.527778	0.61				Trial-3	11.55	10.17
			Thr	0.647059	0.643519	0.47
			Ala	0.446078	0.435185	0.66
			Pro	0.382353	0.365741	0.4
			Tyr	0.514706	0.490741	0.43
			Val	0.720588	0.689815	0.75
			Met	0.196078	0.180556	0.39
			Cys	0.161765	0.152778	0.28
			Ile	0.259804	0.25463	0.57
			Luc	0.720588	0.699074	0.92
			Phen	0.436275	0.421296	0.66
			Lys	0.828431	0.782407	0.75

## Sheet: Lipid comp.
				Free-range eggs
				FA	Trial-1	Trial-2	Trial-3	Average	SD
				C16:0	24.2463	24.4592	24.3097	24.3384	0.109304
				C18:0	8.4	8.88	8.57	8.61667	0.243379
				C18:1	41.06	40.35	40.9	40.77	0.372424
				C18:2	17.59	17.59	17.59	17.59	0
				Conventional eggs
				FA	Trial-1	Trial-2	Trial-3	Average	SD
				C16:0	26.6247	26.7418	26.6628	26.6764	0.0597516
				C18:0	8.81	9.04	8.92	8.92333	0.115036
				C18:1	45.92	45.29	45.73	45.6467	0.323161
				C18:2	10.83	10.95	10.91	10.8967	0.061101
				Cholesterol	Free-range	Conventional
				(mg/extra-large yolk)
				Trial-1	243.6	263.3
				Trial-2	243.6	262.2
				Trial-3	243.5	263.5
				Average	243.567	263
				SD	0.057735	0.7

## Sheet: Physical comp.
				Free-range	Egg total (g)	yolk (g)	shell (g)	yolk (%)	albumen (g)	albumen (%)	albumen pH	shell (%)
				Weights	68.34	18.51	8.36	27.0852	41.47	60.6819	na	12.233
					80.68	19.57	9.24	24.2563	51.87	64.291	na	11.4527
					65.56	15.81	8.59	24.1153	41.16	62.7822	8.96	13.1025
					55.57	15.27	8.59	27.4789	31.71	57.0632	9.1	15.458
					57.24	15.62	8.83	27.2886	32.79	57.2851	8.23	15.4263
					65.5	19.64	8.98	29.9847	36.88	56.3053	8.98	13.7099
				Avg	65.4817	17.4033	8.765	26.7015	39.3133	59.7348	8.8175	13.5637
				SD	9.00369	2.05873	0.316654	2.21554	7.37587	3.34193	0.396516	1.64432
				conventional	Egg total (g)	yolk (g)	shell (g)	yolk (%)	albumen (g)	albumen (%)	albumen pH	shell (%)		T-test	p-value
				Weights	58.25	15.3	7.86	26.2661	35.09	60.2403	na	13.4936		egg total wgts	0.11
					59.88	18	7.86	30.0601	34.02	56.8136	na	13.1263		yolk (g)	0.78
					59.61	18.43	7.96	30.9176	33.22	55.7289	9	13.3535		shell (g)	0.002
					57.42	17.62	7.89	30.6862	31.91	55.573	9.02	13.7409		yolk %	0.05
					56.14	16.37	7.45	29.1592	32.32	57.5704	9.07	13.2704		albumen (g)	0.12
					59.9	17.1	7.97	28.5476	34.83	58.1469	9.09	13.3055		albumen (%)	0.16
				Avg	58.5333	17.1367	7.83167	29.2728	33.565	57.3455	9.045	13.3817		albumen pH	0.3
				SD	1.54197	1.15014	0.19302	1.72639	1.30698	1.73845	0.0420317	0.212486		shell (%)	0.8
